# Supplementary material for: Highly efficient polymer light-emitting diodes using graphene oxide-modified flexible single-walled carbon nanotube electrodes
Source: Royal Society of Chemistry journal article supplement (doi:10.1039/c2jm34700h), 2012-01-01
Supplement: c2jm34700h.pdf [file c2jm34700h.pdf]

Supplementary Information

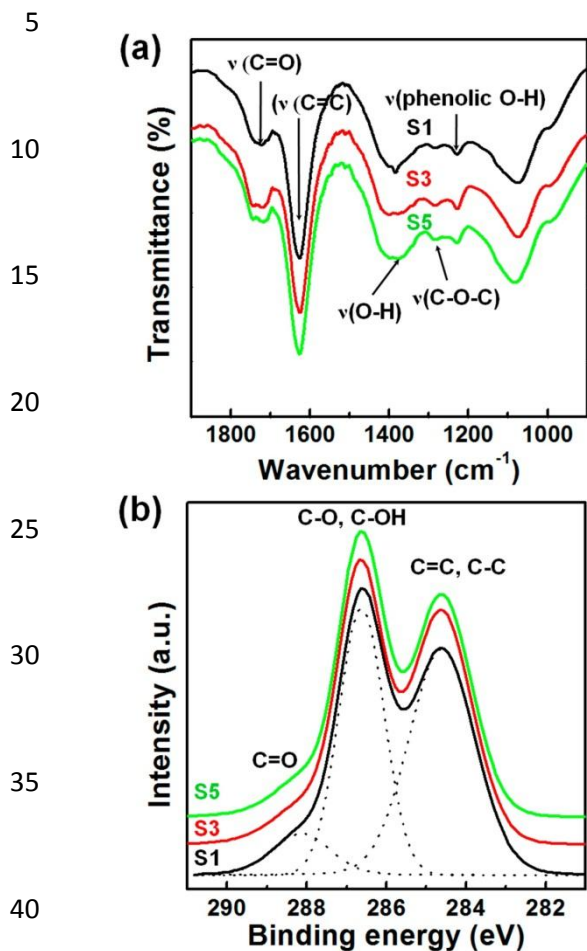

Figure S1. (a) FT-IR and (b) XPS spectra of size-sorted GO (S1 (black-line), S3 (red-line), S5 (green-line)).

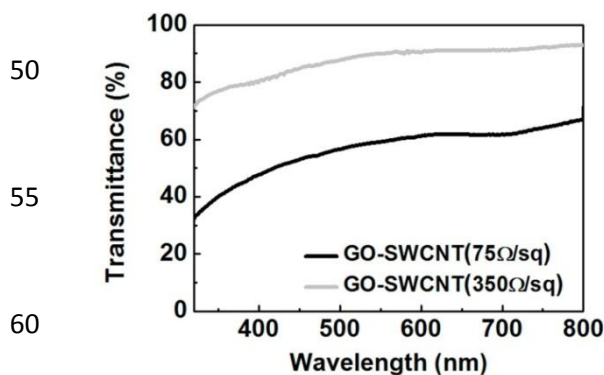

Figure S2. Transmittance spectra of GO-SWCNT electrodes with different sheet resistance values.

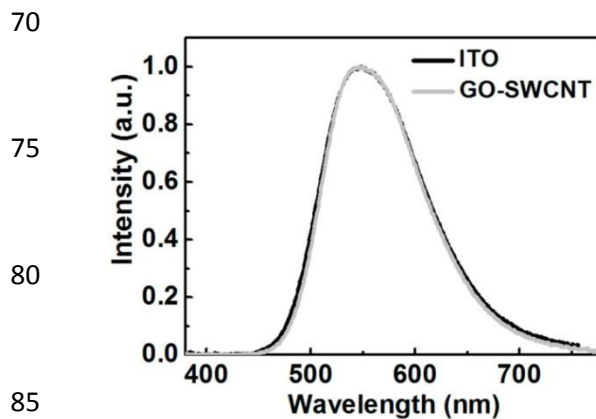

Figure S3. The EL spectra of GO-SWCNT based PLED and ITO-based PLED.

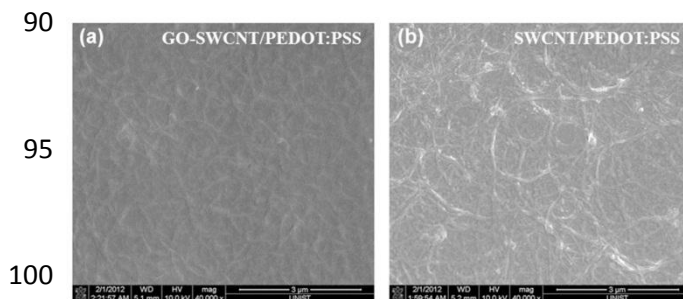

Figure S4. SEM images of (a) GO-SWCNT/PEDOT:PSS and (b) SWCNT/PEDOT:PSS layer.

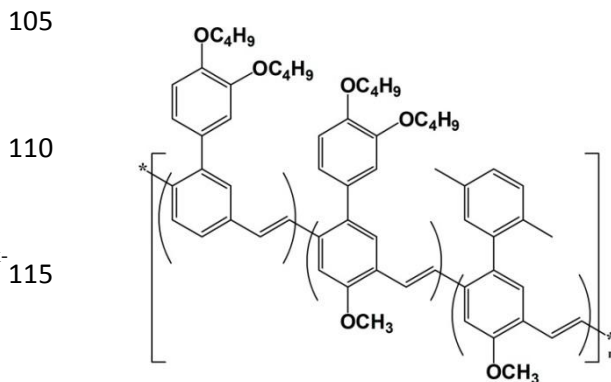

Figure S5. Molecular structure of super yellow.
